# Supplementary material
Source: HighWire-hosted journal article supplement (https://tobaccocontrol.bmj.com/content/32/6/734)
Supplement: inline-supplementary-material-1 [file inline-supplementary-material-1.pdf]

**Supplemental Tables for Fong et al. The Impact of Canada's Menthol Cigarette Ban on Quitting Among Menthol Smokers: Pooled Analysis of Pre-Post Evaluation from the ITC Project and the Ontario Menthol Ban Study and Projections of Impact in the United States**

**Supplemental Table 1.** Comparison of ITC Canada Survey and Ontario Menthol Ban Survey

**Supplemental Table 2.** The association of post-ban smoking cessation and pre-ban menthol smoking status for all smokers and for daily smokers, and interactions with ethnicity (Black vs. Non-Black) for all smokers

Supplemental Table 1. Comparison of ITC Canada Survey and Ontario Menthol Ban Survey

|                               | <b>ITC Canada Survey</b>                                                                                                                                                                                                                                                                                                                                                                                                                                                                                                                                                                                                                                                                                                                                                                                                                                                                                                       | <b>Ontario Menthol Ban Study</b>                                                                                                                                                                                                                                                                                                                                                                                                                                                                                                                                                                                                                                                                                                                                                                                                                               |
|-------------------------------|--------------------------------------------------------------------------------------------------------------------------------------------------------------------------------------------------------------------------------------------------------------------------------------------------------------------------------------------------------------------------------------------------------------------------------------------------------------------------------------------------------------------------------------------------------------------------------------------------------------------------------------------------------------------------------------------------------------------------------------------------------------------------------------------------------------------------------------------------------------------------------------------------------------------------------|----------------------------------------------------------------------------------------------------------------------------------------------------------------------------------------------------------------------------------------------------------------------------------------------------------------------------------------------------------------------------------------------------------------------------------------------------------------------------------------------------------------------------------------------------------------------------------------------------------------------------------------------------------------------------------------------------------------------------------------------------------------------------------------------------------------------------------------------------------------|
| <b>Sample</b>                 | Nationally representative sample of 1236 adult (18+) smokers; residents of 7 provinces (Quebec, Ontario, Prince Edward Island, Newfoundland and Labrador, British Columbia, Saskatchewan, and Manitoba)                                                                                                                                                                                                                                                                                                                                                                                                                                                                                                                                                                                                                                                                                                                        | Provincially representative sample of 1084 adult (18+) smokers + additional smokers from a dedicated Ontario Smokers' Panel; residents of Ontario                                                                                                                                                                                                                                                                                                                                                                                                                                                                                                                                                                                                                                                                                                              |
| <b>Sampling frame</b>         | Random selection of respondents from a high-quality national web panel (Leger), using a combination of probability-based, or non-probability opt-in sampling frames, or a combination of these methods.                                                                                                                                                                                                                                                                                                                                                                                                                                                                                                                                                                                                                                                                                                                        | Respondents recruited using a combination of random digit dialing and convenience sample.                                                                                                                                                                                                                                                                                                                                                                                                                                                                                                                                                                                                                                                                                                                                                                      |
| <b>Survey dates</b>           | Pre-ban: July 7, 2016 to November 22, 2016<br>Post-ban: February 23, 2018 to July 9, 2018                                                                                                                                                                                                                                                                                                                                                                                                                                                                                                                                                                                                                                                                                                                                                                                                                                      | Pre-ban: September to December 2016<br>Post-ban: January to August 2018                                                                                                                                                                                                                                                                                                                                                                                                                                                                                                                                                                                                                                                                                                                                                                                        |
| <b>Menthol smoking status</b> | <p>Pre- and post-ban: Respondents who said they had a regular brand of cigarettes were asked: 'How would you describe the flavour of your usual cigarette brand?' (response options: just tobacco, tobacco and menthol, tobacco and some other flavour, refused, don't know). Respondents were also asked if their last purchased brand is just tobacco, tobacco and menthol, or tobacco and some other flavour.</p> <p>Respondents who selected 'tobacco and menthol' flavour as their regular brand were categorised as 'mainly menthol smokers' Those who do not have a regular brand or their regular brand is not menthol but bought menthol cigarettes in their last purchase were categorised as 'occasional menthol smokers'. Those who selected 'just tobacco' or 'tobacco and some other flavour' and those who did not buy menthol cigarettes in their last purchase were categorised as 'non-menthol smokers'.</p> | <p>Pre-ban: self-reported past year use of menthol cigarettes (response options: every day, occasionally, on rare occasions, not at all). Daily smokers who used menthol cigarettes in the past year and occasional smokers who reported occasional use of menthol cigarettes in the past year were categorised as 'mainly menthol smokers'. Daily smokers who reported occasional use of menthol cigarettes in the past year were categorized as 'occasional menthol smokers'. Those who had not used menthol cigarettes in past year were categorised as 'non-menthol smokers'.</p> <p>Post-ban: self-reported current use of menthol cigarettes. Respondents who reported current use of menthol cigarettes were categorised as 'menthol smokers', and those who were not currently using menthol cigarettes were categorised as 'non-menthol smokers'.</p> |
| <b>Post-ban quit success</b>  | Respondents who reported that they were not currently smoking cigarettes at post-ban.                                                                                                                                                                                                                                                                                                                                                                                                                                                                                                                                                                                                                                                                                                                                                                                                                                          | Respondents who reported that they were not currently smoking cigarettes at post-ban.                                                                                                                                                                                                                                                                                                                                                                                                                                                                                                                                                                                                                                                                                                                                                                          |

Supplemental Table 2. The association of post-ban smoking cessation (1= current quitter; 0 = current smoker) and pre-ban menthol smoking status for all smokers and for daily smokers, including interactions with ethnicity (Black vs. Non-Black) for all smokers

| Explanatory variables                    | Pre-ban All Smokers |                    |        |                                                     |        | Pre-ban Daily Smokers |                    |        |
|------------------------------------------|---------------------|--------------------|--------|-----------------------------------------------------|--------|-----------------------|--------------------|--------|
|                                          | Main effects        |                    |        | Interaction with ethnicity<br>(Black vs. Non-Black) |        | N                     | OR (95% CI)        | P      |
|                                          | N                   | OR (95% CI)        | P      | OR (95% CI)                                         | P      |                       |                    |        |
| <b>Pre-ban menthol smoking status</b>    |                     |                    |        |                                                     |        |                       |                    |        |
| Mainly menthol                           | 423                 | 1.64 (1.17 - 2.30) | 0.004  | 21.13 (2.15 - 208.0)                                | 0.009  | 308                   | 1.90 (1.30 - 2.79) | <0.001 |
| Occasional menthol                       | 407                 | 1.24 (0.84 - 1.82) | 0.271  | 4.96 (0.47 - 52.25)                                 | 0.182  | 407                   | 1.35 (0.90 - 2.02) | 0.144  |
| Non-menthol                              | 1490                | Reference          |        | Reference                                           |        | 1285                  | Reference          |        |
| <b>Pre-ban smoking status</b>            |                     |                    |        |                                                     |        |                       |                    |        |
| Daily                                    | 2000                | 0.48 (0.33 - 0.68) | <0.001 | 0.48 (0.34 - 0.69)                                  | <0.001 | -                     |                    |        |
| Non-daily                                | 320                 | Reference          |        | Reference                                           |        | -                     |                    |        |
| <b>Sex</b>                               |                     |                    |        |                                                     |        |                       |                    |        |
| Female                                   | 1262                | 0.87 (0.68 - 1.10) | 0.241  | 0.87 (0.68 - 1.11)                                  | 0.263  | 1089                  | 0.76 (0.58 - 1.00) | 0.046  |
| Male                                     | 1058                | Reference          |        | Reference                                           |        | 911                   | Reference          |        |
| <b>Age group</b>                         |                     |                    |        |                                                     |        |                       |                    |        |
| 18-24                                    | 247                 | 0.79 (0.52 - 1.19) | 0.262  | 0.79 (0.52 - 1.19)                                  | 0.257  | 160                   | 0.52 (0.29 - 0.92) | 0.024  |
| 25-39                                    | 510                 | 1.20 (0.86 - 1.69) | 0.287  | 1.20 (0.86 - 1.69)                                  | 0.287  | 425                   | 1.04 (0.72 - 1.52) | 0.822  |
| 40-54                                    | 754                 | 0.86 (0.63 - 1.17) | 0.332  | 0.86 (0.63 - 1.17)                                  | 0.327  | 673                   | 0.74 (0.53 - 1.03) | 0.075  |
| 55 and up                                | 809                 | Reference          |        | Reference                                           |        | 742                   | Reference          |        |
| <b>Education</b>                         |                     |                    |        |                                                     |        |                       |                    |        |
| Low                                      | 683                 | Reference          |        | Reference                                           |        | 624                   | Reference          |        |
| Medium                                   | 1037                | 1.43 (1.06 - 1.95) | 0.021  | 1.44 (1.06 - 1.96)                                  | 0.019  | 910                   | 1.60 (1.14 - 2.24) | 0.006  |
| High                                     | 582                 | 1.51 (1.08 - 2.12) | 0.017  | 1.53 (1.09 - 2.14)                                  | 0.015  | 452                   | 1.45 (0.98 - 2.13) | 0.063  |
| Not Stated                               | 18                  | 0.97 (0.26 - 3.68) | 0.966  | 0.98 (0.26 - 3.72)                                  | 0.978  | 14                    | 0.57 (0.07 - 4.51) | 0.593  |
| <b>Pre-ban cigarettes smoked per day</b> |                     |                    |        |                                                     |        |                       |                    |        |
| 1-10 cigarettes                          | 960                 | 1.10 (0.71 - 1.71) | 0.670  | 1.10 (0.71 - 1.70)                                  | 0.684  | 660                   | 1.22 (0.76 - 1.96) | 0.407  |
| 11-20 cigarettes                         | 895                 | 0.77 (0.50 - 1.20) | 0.252  | 0.77 (0.50 - 1.20)                                  | 0.249  | 885                   | 0.87 (0.55 - 1.37) | 0.537  |
| 21-30 cigarettes                         | 317                 | 0.34 (0.19 - 0.61) | <0.001 | 0.34 (0.19 - 0.61)                                  | <0.001 | 316                   | 0.36 (0.20 - 0.67) | 0.001  |
| 31+ cigarettes                           | 148                 | Reference          |        | Reference                                           |        | 139                   | Reference          |        |
| <b>Study region</b>                      |                     |                    |        |                                                     |        |                       |                    |        |
| ITC-BC                                   | 190                 | 0.65 (0.36 - 1.16) | 0.143  | 0.64 (0.36 - 1.15)                                  | 0.137  | 161                   | 0.77 (0.41 - 1.44) | 0.413  |
| ITC-MB/SK/NL/PEI                         | 143                 | 0.71 (0.38 - 1.34) | 0.290  | 0.71 (0.38 - 1.33)                                  | 0.287  | 124                   | 0.66 (0.31 - 1.38) | 0.266  |
| ITC-ON                                   | 572                 | 0.58 (0.40 - 0.85) | 0.005  | 0.59 (0.40 - 0.86)                                  | 0.006  | 461                   | 0.57 (0.37 - 0.88) | 0.011  |
| ITC-QC                                   | 331                 | 0.75 (0.48 - 1.15) | 0.182  | 0.75 (0.49 - 1.15)                                  | 0.186  | 277                   | 0.78 (0.48 - 1.27) | 0.313  |
| Ontario Menthol Ban Study-ON             | 1084                | Reference          |        | Reference                                           |        | 977                   | Reference          |        |

| Explanatory variables                             | Pre-ban All Smokers |                    |       |                                                     |       | Pre-ban Daily Smokers |                    |       |
|---------------------------------------------------|---------------------|--------------------|-------|-----------------------------------------------------|-------|-----------------------|--------------------|-------|
|                                                   | Main effects        |                    |       | Interaction with ethnicity<br>(Black vs. Non-Black) |       | N                     | OR (95% CI)        | P     |
|                                                   | N                   | OR (95% CI)        | P     | OR (95% CI)                                         | P     |                       |                    |       |
| <b>Ethnicity</b>                                  |                     |                    |       |                                                     |       |                       |                    |       |
| Black                                             | 30                  | 0.76 (0.27 – 2.13) | 0.593 | 0.24 (0.05 – 1.28)                                  | 0.094 | 25                    | 0.74 (0.20 – 2.70) | 0.648 |
| Non-Black                                         | 2290                | Reference          |       | Reference                                           |       | 1975                  | Reference          |       |
| <b>Pre-ban menthol smoking status * ethnicity</b> |                     |                    |       |                                                     |       |                       |                    |       |
| Mainly menthol, Black                             | 4                   |                    |       | 13.08 (1.31 - 131.1)                                | 0.029 |                       |                    |       |
| Mainly menthol, Non-Black                         | 419                 |                    |       | Reference                                           |       |                       |                    |       |
| Occasional menthol, Black                         | 9                   |                    |       | 4.05 (0.38 - 42.68)                                 | 0.245 |                       |                    |       |
| Occasional menthol, Non-Black                     | 398                 |                    |       | Reference                                           |       |                       |                    |       |
| Non-menthol, Black                                | 17                  |                    |       | Reference                                           |       |                       |                    |       |
| Non-menthol, Non-Black                            | 1473                |                    |       | Reference                                           |       |                       |                    |       |

Note. The interactions with ethnicity (Black vs. non-Black) were not presented for daily smokers due to insufficient sample size.
